# Supplementary material
Source: HighWire-hosted journal article supplement (https://gpsych.bmj.com/content/31/1/e000005)
Supplement: inline-supplementary-material-1 [file inline-supplementary-material-1.docx]

**复发性非霍奇金淋巴瘤表现的精神病：一个罕见的案例**

Ali M, Das S

**概述：**脑瘤的精神病表现是罕见的，但在文献中主要描述为其他的神经损伤。在脑瘤中经常会描述记忆丧失、注意力和集中力困难、抑郁、焦虑和情绪症状。没有运动或感觉功能损伤的精神分裂症样表现可能会令临床医生陷入诊断困境。原发性中枢神经系统淋巴瘤是一种高度恶性疾病，死亡率高，需要得到立即关注。我们的病例是关于术后伴有精神病症状的较独特的复发，启发我们需要在临床推广中具备更多的警惕性。

**关键词**：淋巴瘤，精神病，复发
